# Gender disparities in anxiety and quality of life in patients with an implantable cardioverter–defibrillator

Mirela Habibović<sup>1</sup>, Krista C. van den Broek<sup>1</sup>, Dominic A.M.J. Theuns<sup>2</sup>, Luc Jordaens<sup>2</sup>, Marco Alings<sup>3</sup>, Pepijn H. van der Voort<sup>4</sup>, and Susanne S. Pedersen<sup>1,2\*</sup>

<sup>1</sup>CoRPS-Department of Medical Psychology and Neuropsychology, Tilburg University, PO Box 90153, 5000 LE Tilburg, The Netherlands; <sup>2</sup>Department of Cardiology, Thoraxcenter, Erasmus Medical Center, Rotterdam, The Netherlands; <sup>3</sup>Department of Cardiology, Amphia Hospital, Breda, The Netherlands; and <sup>4</sup>Department of Cardiology, Catharina Hospital, Eindhoven, The Netherlands

Received 30 March 2011; accepted after revision 6 July 2011; online publish-ahead-of-print 6 August 2011

## Aims

A paucity of studies in implantable cardioverter–defibrillator (ICD) patients has examined gender disparities in patient-reported outcomes, such as anxiety and quality of life (QoL). We investigated (i) gender disparities in anxiety and QoL and (ii) the magnitude of the effect of gender vs. New York Heart Association (NYHA) functional class (III/IV), ICD shock, and Type D personality on these outcomes.

## Methods and results

Implantable cardioverter–defibrillator patients ( $n = 718$ ; 81% men) completed the State-Trait Anxiety Inventory (STAI) and the Short-Form Health Survey 36 (SF-36) at baseline and 12 months post-implantation. The magnitude of the effect was indicated using Cohen's effect size index. Multivariate analysis of covariance for repeated measures showed no differences between men and women on mean scores of anxiety ( $F_{(1,696)} = 2.67, P = 0.10$ ). Differences in QoL were observed for only two of the eight subscales of the SF-36, with women reporting poorer physical functioning ( $F_{(1,696)} = 7.14, P = 0.008$ ) and vitality ( $F_{(1,696)} = 4.88, P = 0.028$ ) than men. With respect to anxiety, effect sizes at baseline and 12 months for gender, NYHA class, and ICD shocks were small. A large effect size for Type D personality was found at both time points. For QoL, at baseline and 12 months, the effect sizes for gender were small, while the influence of NYHA class and Type D personality was moderate to large.

## Conclusions

Men and women did not differ on mean anxiety or QoL scores, except for women reporting poorer QoL on two domains. The relative influence of gender on anxiety and QoL was less than that of NYHA functional class and Type D personality.

## Keywords

Anxiety • Gender disparities • Implantable cardioverter–defibrillator • Quality of life

## Introduction

Implantable cardioverter–defibrillator (ICD) therapy is the mainstay of treatment for primary and secondary prevention of sudden cardiac death.<sup>1</sup> Implantable cardioverter–defibrillator treatment is generally well accepted by most patients, but a significant subgroup (i.e. 24–33% of ICD patients) experiences psychological difficulties, with the most profound manifestations being anxiety and depression,<sup>2,3</sup> post-traumatic stress disorder,<sup>4,5</sup> and poor quality of life (QoL).<sup>3,6</sup> In turn, these patient-reported outcomes have been associated with risk of ventricular tachyarrhythmias<sup>7–9</sup> and mortality<sup>10,11</sup> in ICD patients. Hence, it is important to be able to

identify patients who are at risk of adverse psychological outcomes and to provide extra support if needed.

Implantable cardioverter–defibrillator shock is generally considered the primary culprit in the event of the development of psychological distress and deterioration in QoL.<sup>12,13</sup> Although ICD shock may have a profound influence on individual patients, the evidence for an influence of shock on psychological outcomes and QoL is inconsistent and likely to be more complex than generally assumed.<sup>14,15</sup> The evidence for an influence of ICD indication and device advisories is also mixed, with some but not all studies finding an effect on psychological outcomes and poor QoL.<sup>16–20</sup> Younger age,<sup>21</sup> symptomatic heart failure,<sup>22</sup> lack of optimism,<sup>23</sup>

\* Corresponding author. Tel: +31 13 466 2503; fax: +3113 466 2067, Email: S.S.Pedersen@uvt.nl

Published on behalf of the European Society of Cardiology. All rights reserved. © The Author 2011. For permissions please email: journals.permissions@oup.com.

diabetes,<sup>24</sup> and Type D personality<sup>25</sup> (patients who experience a range of negative emotions, but inhibit the expression of these emotions) constitute other factors that have been associated with risk of poorer psychological and QoL outcomes.

Gender has also been proposed as a potentially important risk factor for psychological distress and poor QoL.<sup>6,26</sup> Gender disparities may be attributed to differences in the way of dealing with stressful situations,<sup>27</sup> in the acceptance of mechanical devices<sup>28</sup> and pain sensitivity.<sup>29</sup> Based on these findings, it would make sense to expect that women experience more psychological distress after ICD implantation than men. However, recent studies on gender differences in anxiety and QoL have shown mixed findings, with some of the studies indicating that women are more prone to experiencing anxiety than men,<sup>3,30</sup> while other studies found no gender differences in anxiety.<sup>31–33</sup> Studies on QoL also show inconsistent findings, with some<sup>30,34</sup> but not all studies supporting the presence of gender differences in QoL.<sup>31,35–37</sup> These mixed findings are corroborated in a recent viewpoint focusing on gender disparities in patient-reported outcomes, such as anxiety, depression, and QoL,<sup>38</sup> and may in part be explained by heterogeneity in study designs but also by the use of smaller scale *ad hoc* studies that were not designed a priori to examine gender differences on these outcomes, with the risk that some studies were not sufficiently powered to find an effect if present.

Hence, in a large multi-centre study of ICD patients with a 12-month follow-up, we examined (i) potential gender disparities in anxiety and QoL and (ii) the magnitude of the effect of gender vs. NYHA functional class III/IV (as an indicator of disease severity), ICD shock, and Type D personality as determinants of anxiety and QoL, using Cohen's effect size index.<sup>39</sup> We expected that women and men would adapt equally well to the ICD and that the effect of gender on anxiety and QoL would be less compared with the effect of NYHA class, ICD shock, and Type D personality.

## Methods

### Patient sample and procedure

Patients from three Dutch hospitals (Amphia Hospital, Breda; Catharina Hospital, Eindhoven; Erasmus Medical Center, Rotterdam) who were hospitalized between May 2003 and June 2009 for an ICD implantation were included in the study and completed a set of standardized and validated questionnaires. Patients included in the Erasmus Medical Centre were part of the ongoing *Mood and personality as precipitants of arrhythmia in patients with an Implantable cardioverter–Defibrillator: A prospective Study (MIDAS)*. Exclusion criteria were significant cognitive impairments (e.g. dementia), life-threatening comorbidities (e.g. cancer), a history of psychiatric illness other than affective/anxiety disorders, and insufficient knowledge of the Dutch language.

The study was approved by the Medical Ethics Committee of the participating hospitals and conducted in accordance with the Helsinki Declaration. All patients provided written informed consent.

### Demographic and clinical variables

Information on demographic and clinical variables were obtained either via purpose-designed questions in the questionnaire or via the patients' medical records. Demographic variables included age, gender, marital status (single vs. having a partner), education (primary school vs.

higher), and working status (working vs. not working). Clinical variables included ICD indication (primary vs. secondary prevention), cardiac resynchronization therapy (CRT), coronary artery disease (CAD), New York Heart Association (NYHA) functional class (NYHA class I/II vs. III/IV), left ventricular ejection fraction (LVEF <35%), QRS width (QRS >120 ms), diabetes, smoking, and cardiac [i.e. angiotensin-converting enzyme (ACE)-inhibitors, amiodarone, beta-blockers, digoxin, diuretics, and statins], and psychotropic medication.

Information on ICD shocks (appropriate and inappropriate) occurring during the 12-month follow-up period was obtained via device interrogation and extracted from the patients' medical records. To enhance the power, appropriate and inappropriate shocks were combined in one variable.

## Measures

### Anxiety

The state version of the State-Trait Anxiety Inventory (STAI) was used to assess general symptoms of anxiety, such as worries and concerns, and tension.<sup>40</sup> In the current study we only used the State (STAI-S) measure because we wanted to assess the presence of symptoms of anxiety at baseline and not anxiety as a stable trait. The STAI-S is a self-report questionnaire, consisting of two 10-item scales, measuring, respectively, the presence and absence of anxiety symptoms. Items are answered on a 4-point Likert scale ranging from 1 (not at all) to 4 (very much so), with total scores ranging from 20 to 80, with a high score indicating a high level of anxiety. A cut-off score  $\geq 40$  indicates probable clinical levels of anxiety.<sup>40</sup> The STAI-S has shown to be a valid and reliable measure, with Cronbach's alpha ranging from 0.87 to 0.92.<sup>40</sup> The STAI-S was administered at baseline and at 12 months post-implantation.

### Quality of life

The Dutch version of the Short-Form Health Survey (SF-36) was administered to assess QoL.<sup>41</sup> The SF-36 consists of eight subscales: Physical Functioning (PF; 10 items), Social Functioning (SF; 2 items), Role Limitations due to Physical Functioning (RP; 4 items), Role Limitations due to Emotional Functioning (RE; 3 items), Mental Health (MH; 5 items), Vitality (VT; 4 items), Bodily Pain (BP; 2 items), and General Health (GH; 5 items). Items are answered according to standardized response choices. Raw scores are transformed to scale scores ranging from 0 to 100, with higher scores indicating better levels of functioning.<sup>42</sup> For the BP subscale, a higher score denotes the absence of pain. The validity and reliability of the Dutch SF-36 are good, with a mean alpha of 0.84 across groups from the Dutch general population, migraine patients, and cancer patients.<sup>41</sup> The SF-36 was administered at baseline and at 12 months post-implantation.

### Type D personality

Type D personality was assessed with the 14-item Type D scale (DS14).<sup>43</sup> The DS14 consists of two 7-item subscales measuring *Negative Affectivity* ('I am often in a bad mood') and *Social Inhibition* ('I often feel inhibited in social interactions'), respectively. Each item is rated on a 5-point Likert scale from 0 (false) to 4 (true), with total scores ranging from 0 to 28 for both subscales. Patients scoring  $\geq 10$  on both subscales are classified as Type D, which has shown to be the most optimal cut-off for both subscales for determining caseness.<sup>43,44</sup> Both subscales are internally consistent, with a Cronbach's alpha of 0.88 for *Negative Affectivity* and 0.86 for *Social Inhibition*, and a test-retest reliability over a 3-month period of  $r = 0.72$  and  $r = 0.82$  for the two subscales, respectively.<sup>43</sup> The DS14 is a stable personality measure over an 18-month period in post-myocardial infarction patients.<sup>45</sup>

## Statistical analysis

Discrete variables were compared with the  $\chi^2$  test and continuous variables with Student's *t*-test for independent samples. To compare the relative influence of gender with that of NYHA functional class (III/IV), ICD shocks, and Type D personality on anxiety and QoL, the effect size was calculated using Cohen's effect size *d*.<sup>39</sup> According to Cohen's *d*, an effect size index of 0.20 represents a small effect, 0.50 a moderate effect and  $\geq 0.80$  a large effect. Multivariate analysis of variance (MANOVA) for repeated measures was performed to examine the relationship between gender and anxiety and gender and QoL, respectively. To adjust for potential confounders, we used MANCOVA. Two models were tested in the adjusted analysis. In the first model, we adjusted for all covariates except for NYHA functional class, LVEF, and QRS width. These variables all form part of the criteria for CRT indication and were excluded from analysis to avoid the problem of multicollinearity. In the second model, we added NYHA functional class to the set of covariates in the first model to control for symptomatic heart failure. In both models we also adjusted for site of implantation. In secondary analyses, we differentiated between appropriate and inappropriate shocks and whether type of shock had a differential impact on anxiety and QoL. To reduce the chance of Type 1 error (that is, finding a significant result when in fact there is none), we applied a Bonferroni correction to the *t*-tests. The original alpha value of 0.05 was divided by the number of comparisons that were made (i.e. 0.05/9), which resulted in an alpha of 0.006 to indicate statistical significance. All tests were two-tailed and an alpha of 0.05 was used to indicate statistical significance for the  $\chi^2$  test. Data were analysed using SPSS 17.0 (SPSS Inc., Chicago, IL, USA).

## Results

### Patient characteristics

Of 1080 patients who agreed to participate in the study, 82 (7.6%) patients died between baseline and 12 months follow-up, 68 (6.3%) patients refused to participate at 12 months follow-up, 12 (1.1%) were lost to follow-up, and 200 (18.5%) patients had missing data on self-report measures or clinical variables. Hence, statistical analyses are based on 718 (66.5%) patients. Patients who were excluded from analyses did not differ systematically on any of the study variables from the included patients (all *P*'s  $> 0.05$ ; data not shown).

Patient baseline characteristics for the total sample and stratified by gender are shown in *Table 1*. Women were more likely to be younger, to have a higher educational level, and to have a more preserved LVEF, but less likely to have a partner, to have CAD, and to be prescribed ACE-inhibitors, amiodarone, and statins compared with men.

### Anxiety

Multivariate analysis of variance for repeated measures showed a statistically significant difference in anxiety scores between women and men ( $F_{(1,716)} = 4.67, P = 0.031$ ). At baseline, women reported higher mean levels compared with men ( $40.1 \pm 12.1$  vs.  $37.5 \pm 11.7$ ;  $t_{(716)} = -2.33, P = 0.02$ ), however, this was not significant after a Bonferroni correction ( $P > 0.006$ ). Similarly, at 12 months women reported non-significantly higher mean levels of anxiety compared with men ( $36.5 \pm 12.3$  vs.  $34.8 \pm 11.79$ ;

$t_{(716)} = -1.49, P = 0.14$ ). Gender exerted a stable effect on anxiety, as indicated by the non-significant interaction effect for time by gender ( $F_{(1,716)} = 0.76, P = 0.39$ ). Generally, anxiety scores decreased over time, as indicated by a significant main effect for time ( $F_{(1,716)} = 34.90, P < 0.001$ ).

After adjustment for age, marital status, education, and working status, ICD indication CRT, CAD, diabetes, smoking, shocks, and cardiac- and psychotropic medication, MANCOVA for repeated measures showed no statistically significant difference in mean anxiety scores between women and men ( $F_{(1,696)} = 2.67, P = 0.10$ ) (*Table 2*). As listed in *Table 2*, age ( $F_{(1,696)} = 7.85, P = 0.005$ ), lower education ( $F_{(1,696)} = 18.81, P < 0.001$ ), working status (yes) ( $F_{(1,696)} = 10.14, P = 0.002$ ), smoking ( $F_{(1,696)} = 3.91, P = 0.048$ ), diabetes ( $F_{(1,696)} = 5.17, P = 0.023$ ), Type D personality ( $F_{(1,696)} = 152.48, P < 0.001$ ), and use of psychotropic medication ( $F_{(1,696)} = 26.23, P < 0.001$ ) were independently associated with anxiety. The main results did not change when adding NYHA functional class as a covariate to the first model.

In secondary analyses, we examined the influence of appropriate and inappropriate shocks on anxiety separately. Only appropriate shocks ( $F_{(1,696)} = 5.46, P = 0.02$ ) but not inappropriate shocks ( $F_{(1,696)} = 2.16, P = 0.14$ ) were associated with anxiety. The predictive value of the other variables did not change (results not shown).

### Quality of life

Multivariate analysis of variance for repeated measures showed significantly different scores on the PF ( $F_{(1,716)} = 8.31, P = 0.004$ ) and the VT ( $F_{(1,716)} = 9.36, P = 0.002$ ) domains for women and men. At baseline, women reported significantly poorer QoL compared with men on only two of the eight domains; PF ( $49.41 \pm 28.90$  vs.  $58.54 \pm 26.54$ ;  $t_{(716)} = 3.58, P < 0.001$ ) and VT ( $48.91 \pm 21.57$  vs.  $56.29 \pm 22.72$ ;  $t_{(716)} = 3.47, P = 0.001$ ). At 12 months, women still reported poorer QoL on the VT domain ( $55.96 \pm 22.97$  vs.  $60.10 \pm 21.98$ ;  $t_{(716)} = 1.98, P = 0.048$ ). No statistically significant differences were found on the other 6 QoL domains at baseline and 7 QoL domains at 12 months, indicating that women and men with an ICD do not substantially differ in experienced QoL. Gender exerted a stable effect on outcome, as indicated by a non-significant time by sex interaction ( $F_{(1,716)} = 1.12, P = 0.35$ ). Quality of life improved over time as indicated by a significant main effect ( $F_{(1,716)} = 23.54, P < 0.001$ ).

In adjusted analysis, the significant differences in PF ( $F_{(1,696)} = 7.14, P = 0.008$ ) and VT ( $F_{(1,696)} = 4.88, P = 0.028$ ) between women and men remained as observed in univariate analysis. Age, lower education, working status, diabetes, CRT, Type D personality, use of psychotropic medication, and diuretics were associated with four or more domains of QoL (*Table 2*). The main results did not change when adding NYHA class as a covariate to the first model. However, NYHA class was associated with QoL ( $> 4$  domains).

In secondary analyses, we examined the influence of appropriate and inappropriate shock on QoL. Secondary analyses revealed that appropriate shocks were only associated with the GH domain of the SF-36 ( $F_{(1,696)} = 4.46, P = 0.03$ ), but not to the other domains; inappropriate shocks were not related to any domain. The independent associations of the other variables with QoL domains did not change (results not shown).

**Table 1** Patient baseline characteristics for the total sample and stratified by gender<sup>a</sup>

|                                  | Total<br>n = 718 | Male<br>n = 579 | Female<br>n = 139 | P      |
|----------------------------------|------------------|-----------------|-------------------|--------|
| Demographics                     |                  |                 |                   |        |
| Age                              | 60.81 ± 10.97    | 61.4 ± 10.55    | 58.3 ± 12.29      | 0.003  |
| Partner                          | 647 (90.1)       | 534 (92.2)      | 113 (81.3)        | <0.001 |
| Smoking                          | 100 (13.9)       | 80 (13.8)       | 20 (14.4)         | 0.86   |
| Low education                    | 378 (52.6)       | 286 (49.4)      | 92 (66.2)         | <0.001 |
| Not working status (yes)         | 206 (28.7)       | 167 (28.8)      | 39 (28.1)         | 0.85   |
| Center                           |                  |                 |                   |        |
| Amphia                           | 186 (25.9)       | 146 (25.2)      | 40 (28.8)         | 0.31   |
| Catharina                        | 257 (35.8)       | 215 (37.1)      | 42 (30.2)         |        |
| Erasmus                          | 275 (38.3)       | 218 (37.7)      | 57 (41.0)         |        |
| Clinical factors                 |                  |                 |                   |        |
| Indication (secondary)           | 345 (48.1)       | 282 (48.7)      | 63 (45.3)         | 0.47   |
| CAD <sup>b</sup>                 | 484 (67.4)       | 423 (73.1)      | 61 (43.9)         | <0.001 |
| NYHA class III/IV <sup>1,c</sup> | 187 (31.6)       | 144 (30.4)      | 43 (36.4)         | 0.21   |
| LVEF < 35% <sup>2,d</sup>        | 558 (83.5)       | 459 (85.2)      | 99 (76.7)         | 0.021  |
| QRS > 120 <sup>3</sup>           | 386 (55.3)       | 318 (56.5)      | 68 (50.4)         | 0.20   |
| CRT <sup>e</sup>                 | 176 (24.5)       | 133 (23.0)      | 43 (30.9)         | 0.05   |
| Shocks <sup>f</sup>              | 85 (11.8)        | 72 (12.4)       | 13 (9.4)          | 0.31   |
| Appropriate shocks               | 58 (8.1)         | 50 (8.7)        | 8 (5.8)           | 0.27   |
| Inappropriate shocks             | 28 (3.9)         | 24 (4.2)        | 4 (2.9)           | 0.50   |
| Diabetes                         | 115 (16.0)       | 98 (16.9)       | 17 (12.2)         | 0.18   |
| Psychological factors            |                  |                 |                   |        |
| Type D personality               | 146 (20.3)       | 119 (20.6)      | 27 (19.4)         | 0.77   |
| Medication                       |                  |                 |                   |        |
| Psychotropics                    | 123 (17.1)       | 92 (15.9)       | 31 (22.3)         | 0.07   |
| ACE-inhibitors                   | 503 (70.1)       | 417 (72.0)      | 86 (61.9)         | 0.019  |
| Amiodarone                       | 132 (18.4)       | 116 (20.0)      | 16 (11.5)         | 0.021  |
| Beta-blockers                    | 584 (81.3)       | 471 (81.3)      | 113 (81.3)        | 0.99   |
| Digoxin                          | 95 (13.2)        | 78 (13.5)       | 17 (12.2)         | 0.70   |
| Diuretics                        | 438 (61.0)       | 356 (61.5)      | 82 (59.0)         | 0.59   |
| Statins                          | 479 (66.7)       | 415 (71.7)      | 64 (46.0)         | <0.001 |

<sup>a</sup>Results are presented as numbers (percentages) unless otherwise indicated.

<sup>b</sup>Coronary artery disease.

<sup>c</sup>New York Heart Association functional class.

<sup>d</sup>Left ventricular ejection fraction.

<sup>e</sup>Cardiac resynchronization therapy.

<sup>f</sup>Appropriate and inappropriate shocks received between implantation and 12 months follow-up.

<sup>1</sup>n = 592

<sup>2</sup>n = 668

<sup>3</sup>n = 698

## Relative influence of gender, New York Heart Association functional class III/IV, implantable cardioverter–defibrillator shocks, and Type D personality on outcomes

In *Figure 1*, the effect sizes are displayed for the magnitude of the influence of gender, NYHA class, shocks, and Type D personality on anxiety at baseline and at 12 months. As indicated by Cohen's effect size index, the influence of gender on anxiety, both at baseline and 12 months follow-up, was small

with effect sizes of 0.22 and 0.14, respectively. Small effect sizes were also found for the influence of NYHA class and ICD shocks (appropriate and inappropriate) on anxiety at both time points. A large effect size for Type D personality was found. Furthermore, the results show that the relative influence of gender is less than that of NYHA class, ICD shocks, and personality in particular in relation to 12-month anxiety outcomes. For QoL, the effect sizes for gender were also small, while the influence of NYHA class and Type D personality on QoL was moderate to large both at baseline and at 12 months follow-up (*Figure 2*).

**Table 2** Influence of gender on anxiety and quality of life (multivariate analysis of covariance for repeated measures)

|                      | PF<br>F             | SF<br>F             | RP<br>F             | RE<br>F            | MH<br>F             | VT<br>F             | BP<br>F            | GH<br>F             | Anxiety<br>F        |
|----------------------|---------------------|---------------------|---------------------|--------------------|---------------------|---------------------|--------------------|---------------------|---------------------|
| Time                 | 3.07                | 1.03                | 5.14 <sup>§</sup>   | 4.66 <sup>§</sup>  | 11.36 <sup>§</sup>  | 0.64                | 2.61               | 2.75                | 2.42                |
| Gender               | 7.14 <sup>§</sup>   | 0.73                | 1.50                | 0.88               | 0.25                | 4.88 <sup>§</sup>   | 2.65               | 0.20                | 2.67                |
| Age                  | 1.46                | 8.12 <sup>§</sup>   | 2.32                | 7.74 <sup>§</sup>  | 3.10                | 8.39 <sup>§</sup>   | 1.10               | 14.12 <sup>  </sup> | 7.85 <sup>§</sup>   |
| Marital status (yes) | 0.12                | 0.11                | 0.15                | 1.58               | 0.00                | 1.64                | 0.86               | 0.60                | 0.00                |
| Smoking              | 3.44                | 3.45                | 2.28                | 3.30               | 3.31                | 7.08 <sup>§</sup>   | 2.05               | 4.06 <sup>§</sup>   | 3.91 <sup>§</sup>   |
| Education (low)      | 10.71 <sup>  </sup> | 1.92                | 9.82 <sup>#</sup>   | 17.84 <sup>#</sup> | 12.67 <sup>  </sup> | 13.04 <sup>  </sup> | 5.31 <sup>§</sup>  | 2.58                | 18.81 <sup>#</sup>  |
| Working status (yes) | 16.28 <sup>#</sup>  | 14.88 <sup>#</sup>  | 13.54 <sup>  </sup> | 19.76 <sup>#</sup> | 0.01                | 5.05 <sup>§</sup>   | 2.84               | 12.69 <sup>  </sup> | 10.14 <sup>  </sup> |
| Site of implantation | 0.93                | 4.56 <sup>§</sup>   | 0.38                | 1.41               | 5.08 <sup>§</sup>   | 4.55 <sup>§</sup>   | 0.38               | 0.91                | 1.93                |
| Indication           | 0.10                | 0.00                | 0.01                | 0.00               | 0.11                | 0.53                | 0.20               | 0.38                | 0.46                |
| CAD <sup>a</sup>     | 1.36                | 0.66                | 2.01                | 0.43               | 0.38                | 0.06                | 3.06               | 5.14 <sup>§</sup>   | 0.23                |
| CRT <sup>b</sup>     | 10.80 <sup>  </sup> | 0.35                | 11.06 <sup>  </sup> | 2.89               | 4.15 <sup>§</sup>   | 14.82 <sup>#</sup>  | 0.01               | 11.99 <sup>  </sup> | 1.46                |
| Shocks <sup>c</sup>  | 0.08                | 0.88                | 1.35                | 0.65               | 0.15                | 0.09                | 0.02               | 0.97                | 2.47                |
| Diabetes             | 17.23 <sup>#</sup>  | 9.86 <sup>§</sup>   | 10.14 <sup>§</sup>  | 9.72 <sup>§</sup>  | 0.93                | 11.77 <sup>§</sup>  | 6.79               | 14.97 <sup>  </sup> | 5.17 <sup>§</sup>   |
| Type D personality   | 10.70 <sup>  </sup> | 33.72 <sup>#</sup>  | 15.67 <sup>#</sup>  | 34.08 <sup>#</sup> | 122.96 <sup>#</sup> | 35.76 <sup>#</sup>  | 9.07 <sup>  </sup> | 45.16 <sup>#</sup>  | 152.47 <sup>#</sup> |
| Psychotropics        | 13.70 <sup>#</sup>  | 22.49 <sup>#</sup>  | 12.08 <sup>§</sup>  | 8.98 <sup>§</sup>  | 38.02 <sup>#</sup>  | 21.77 <sup>#</sup>  | 27.59 <sup>#</sup> | 12.55 <sup>§</sup>  | 26.23 <sup>#</sup>  |
| ACE-inhibitors       | 0.08                | 1.79                | 0.32                | 0.44               | 4.34 <sup>§</sup>   | 0.28                | 3.13               | 0.14                | 0.19                |
| Amiodarone           | 1.99                | 2.32                | 0.06                | 0.05               | 0.20                | 0.97                | 0.45               | 0.89                | 1.22                |
| Beta-blockers        | 0.26                | 0.08                | 2.76                | 0.27               | 0.41                | 0.07                | 0.17               | 4.32 <sup>§</sup>   | 0.23                |
| Digoxin              | 0.30                | 1.80                | 0.15                | 0.00               | 0.58                | 0.58                | 1.48               | 2.61                | 2.30                |
| Diuretics            | 22.38 <sup>#</sup>  | 10.70 <sup>  </sup> | 11.55 <sup>  </sup> | 1.75               | 0.23                | 9.57 <sup>  </sup>  | 4.30 <sup>§</sup>  | 10.94 <sup>  </sup> | 1.13                |
| Statins              | 0.12                | 1.80                | 0.19                | 1.30               | 0.00                | 0.00                | 0.36               | 0.70                | 0.17                |

PF, Physical Functioning; SF, Social Functioning; RP, Role Physical Functioning; RE, Role Emotional Functioning; MH, Mental Health; VT, Vitality; BP, Bodily Pain; GH, General Health.

<sup>a</sup>Coronary artery disease.

<sup>b</sup>Cardiac resynchronization therapy.

<sup>c</sup>Both appropriate and inappropriate shocks received between implantation and 12 months follow-up.

<sup>§</sup>P < 0.05; <sup>||</sup>P < 0.01; <sup>#</sup>P < 0.001.

Downloaded from https://academic.oup.com/europace/article/13/11/1723/2398829 by guest on 23 April 2024

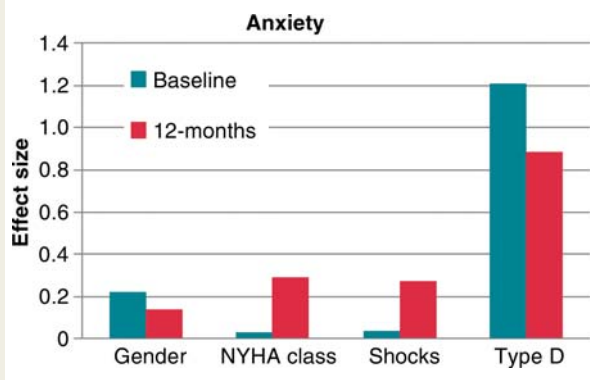

**Figure 1** Effect sizes (Cohen's d) for the magnitude of the influence of gender, New York Heart Association class III/IV, implantable cardioverter–defibrillator shocks, and Type D personality on anxiety at baseline and at 12 months.

## Discussion

In the current study, women experienced more anxiety compared with men, but after statistical adjustment for potential confounders the influence of gender on anxiety was no longer significant.

Women only reported poorer QoL on two of the eight SF-36 subscales, that is, PF and VT, with this gender difference remaining after adjusting for potential confounders. Our findings showed that the relative influence of gender on anxiety and QoL is less than that of NYHA class and Type D personality.

The results of this study are in line with previous research showing that women may report higher anxiety levels compared with men but that these differences may be attributed to other factors and therefore not hold when adjusting for potential confounders.<sup>25,46</sup> In this study, a difference between gender was only observed in univariate but not in multivariate analysis. The univariate difference could be explained by the generally younger age of women in this sample. Previous studies have shown that younger ICD patients tend to experience more psychological difficulties than older patients.<sup>21</sup> Another explanation could be that women in this sample were more likely not to have a partner. Women are more likely to seek social support from their network when dealing with stressful situations.<sup>27</sup> Therefore, women may be more likely to suffer from ICD-related distress in the absence of appropriate support. Our findings on QoL are in line with previous research showing that there are gender differences on some but not all domains of the SF-36 after controlling for potential confounders.<sup>30,34</sup> Taken together, based on previous research and our findings, it seems that women and men overall



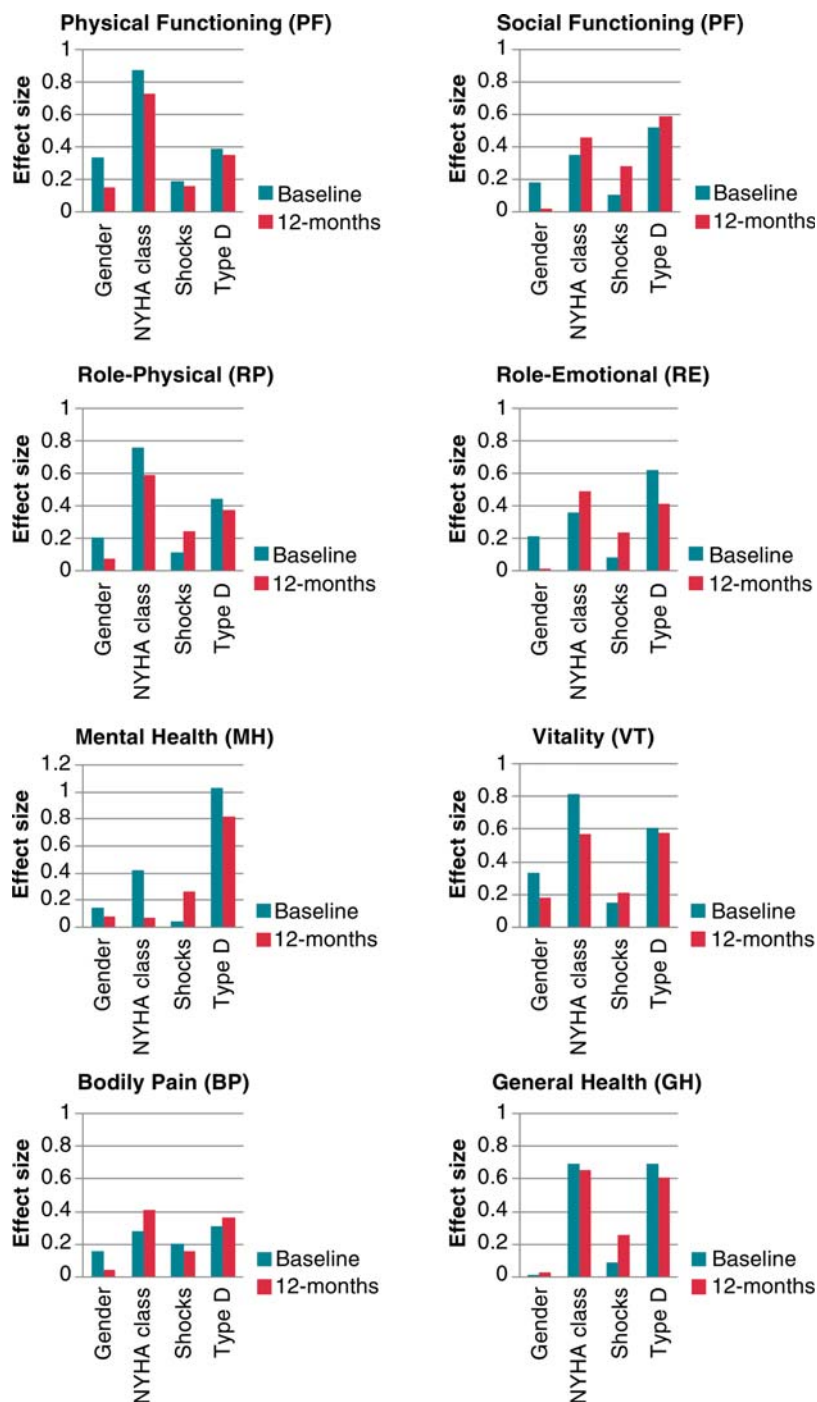

**Figure 2** Effect sizes (Cohen's *d*) for the magnitude of the influence of gender, New York Heart Association class III/IV, implantable cardioverter–defibrillator shocks, and Type D personality on quality of life at baseline and at 12 months.

tend to adapt almost equally well post-ICD implantation. Shocks in general were not associated with the outcomes, but differentiating between appropriate and inappropriate shocks appropriate shocks were associated with anxiety and the GH domain of the SF-36. These findings are in line with previous studies reporting mixed findings on the effect of shocks on patient-centred outcomes.<sup>14,37</sup>

Studies in other cardiac populations have also focused on gender differences and psychological distress. For example in one study, women experienced greater negative mood state and perceived less control over their health compared with men. However, no gender differences were found on the QoL-associated domains.<sup>47</sup> Among patients post-myocardial infarction women were more

likely to report poor QoL compared with men.<sup>48</sup> In patients with coronary heart disease and comorbid depression, women were more likely to be anxious compared with men.<sup>49</sup> Based on these findings, it seems that gender differences may vary across the different cardiac diseases and that the underlying disease is of importance when examining gender differences. In the current study, we also found that symptomatic heart failure (NYHA class III–IV) had a larger influence on both anxiety and QoL than gender.

Few previous studies have included potential mediators, such as somatosensory amplification (i.e. being more aware of bodily sensations and perceiving normal somatic sensations as more intense),<sup>29,46</sup> that may explain gender disparities in outcome.<sup>29,46</sup> The influence of the patient's pre-implantation psychological profile has to date also not been taken into account when focusing on gender disparities, while the patient's personality rather than gender may explain individual differences in patient-reported outcomes.<sup>2,25</sup> In this study, we found Type D personality to be a strong and independent determinant of both anxiety and QoL, which was expected.<sup>32,50</sup> Besides these variables future studies should also consider patients' educational level, working status, comorbidities (e.g. diabetes), and use of (psychotropic) medication. In our sample, these variables were all associated with both anxiety and QoL.

Our findings have some implications for future research. Given the mixed results in the current and previous studies, we believe that it is premature to conclude that gender *per se* is a predictor for disparities in anxiety and QoL. Hence, before we start developing gender-specific interventions, we should try to elucidate whether these mixed findings are due to methodological issues and if gender disparities are present to search for the mechanisms that may account for these disparities, such as differences in e.g. socio-economic status, pre-implantation psychological profile, somatosensory amplification, etc.

The limitations of the study must also be acknowledged. First, anxiety was assessed with a standardized self-report measure rather than a clinical diagnostic interview. Hence, we are only able to draw conclusions with respect to the influence of gender on symptoms of anxiety and not a clinical diagnosis of anxiety. Secondly, information on symptomatic heart failure, as assessed with NYHA functional class, was not available for all patients, and was therefore only included in secondary analysis leading to a smaller number of patients included in this analysis ( $n = 592$ ). Thirdly, due to the use of different measures for depression in the two samples that were combined in this study, we were not able to examine potential gender differences in depression. Fourthly, we used a generic rather than a disease-specific measure of QoL, which may have been less sensitive to tap differences between gender if present. Fifthly, due to a relatively high dropout rate and missing data we could only include 718 (66.5%) of the patients in analyses. However, the excluded patient did not differ systematically on any of the study variables as compared with included patients. Hence, we assume that this limitation had no significant bearing on our findings. This study also has several strengths. These include the prospective study design, the use of a real-world population rather than a selected sample, and the relatively large sample size, increasing the chance that the study was sufficiently powered to find possible differences between men and women if

present, and also enabling us to control statistically for potential demographic, clinical, and psychological confounders that may impinge on the relationship between gender and the outcomes examined.

## Conclusion

Our findings indicate that women and men tend to adapt equally well to living with an ICD and that the patient's personality and the presence of symptomatic heart failure may have a larger influence on anxiety and QoL than gender and ICD shocks. Large-scale studies are warranted to replicate these findings focusing also on gender-specific aspects, such as somatosensory amplification, that might serve to explain gender disparities in patient-reported outcomes.

## Acknowledgements

We would like to thank Eefje Postelmans, Hidde Weetink, Agnes Muskens-Heemskerck, Simone Traa, and Belinda de Lange for inclusion of the patients into the study.

**Conflict of interest:** none declared.

## Funding

This work was supported by a VENI (451-05-001) grant to S.S.P. and a VICI grant (453-04-004) to Dr Johan Denollet from the Netherlands Organisation for Scientific Research (NWO), and a VIDJ grant (91710393) grant no. 300020002 to S.S.P. from the Netherlands Organisation for Health Research and Development (ZonMw), The Hague, The Netherlands.

## References

- Zipes DP, Camm AJ, Borggrefe M, Buxton AE, Chaitman B, Fromer M *et al.* ACC/AHA/ESC 2006 guidelines for management of patients with ventricular arrhythmias and the prevention of sudden cardiac death: a report of the American College of Cardiology/American Heart Association Task Force and the European Society of Cardiology Committee for Practice Guidelines (Writing Committee to Develop Guidelines for Management of Patients With Ventricular Arrhythmias and the Prevention of Sudden Cardiac Death). *J Am Coll Cardiol* 2006;**48**:247–346.
- Van den Broek KC, Nyklicek I, Van der Voort PH, Alings M, Denollet J. Shocks, personality, and anxiety in patients with an implantable defibrillator. *Pacing Clin Electrophysiol* 2008;**31**:850–7.
- Bilge AK, Ozben B, Demircan S, Cinar M, Yilmaz E, Adalet K. Depression and anxiety status of patients with implantable cardioverter defibrillator and precipitating factors. *Pacing Clin Electrophysiol* 2006;**29**:619–26.
- Ladwig KH, Baumert J, Marten-Mittag B, Kolb C, Zrenner B, Schmitt C. Posttraumatic stress symptoms and predicted mortality in patients with implantable cardioverter–defibrillators: results from the prospective living with an implanted cardioverter–defibrillator study. *Arch Gen Psychiatry* 2008;**65**:1324–30.
- Versteeg H, Theuns DA, Erdman RA, Jordaens L, Pedersen SS. Posttraumatic stress in implantable cardioverter defibrillator patients: the role of pre-implantation distress and shocks. *Int J Cardiol* 2011;**146**:438–9.
- Sears SF Jr, Conti JB. Quality of life and psychological functioning of ICD patients. *Heart* 2002;**87**:488–93.
- Whang W, Albert CM, Sears SF Jr, Lampert R, Conti JB, Wang PJ *et al.* Depression as a predictor for appropriate shocks among patients with implantable cardioverter–defibrillators: results from the Triggers of Ventricular Arrhythmias (TOVA) study. *J Am Coll Cardiol* 2005;**45**:1090–5.
- Dunbar SB, Kimble LP, Jenkins LS, Hawthorne M, Dudley W, Slemmons M *et al.* Association of mood disturbance and arrhythmia events in patients after cardioverter defibrillator implantation. *Depress Anxiety* 1999;**9**:163–8.
- van den Broek KC, Nyklicek I, van der Voort PH, Alings M, Meijer A, Denollet J. Risk of ventricular arrhythmia after implantable defibrillator treatment in anxious Type D patients. *J Am Coll Cardiol* 2009;**54**:531–7.

10. Kao CW, Friedmann E, Thomas SA. Quality of life predicts one-year survival in patients with implantable cardioverter defibrillators. *Qual Life Res* 2010;**19**:307–15.
11. Pedersen SS, van den Broek KC, Erdman RA, Jordaens L, Theuns DA. Pre implantation implantable cardioverter defibrillator concerns and Type D personality increase the risk of mortality in patients with an implantable cardioverter–defibrillator. *Europace* 2010;**12**:1446–52.
12. Sears SF, Shea JB, Conti JB. How to respond to an implantable cardioverter–defibrillator shock. *Circulation* 2005;**111**:380–2.
13. Raitt MH. Implantable cardioverter-defibrillator shocks. *J Am Coll Cardiol* 2008;**51**:1366–8.
14. Pedersen SS, Van den Broek KC, Van den Berg M, Theuns DA. Shocks as a determinant of poor patient-centered outcomes in implantable cardioverter defibrillator patients: Is there more to it than meets the eye? *Pacing Clin Electrophysiol* 2009;**33**:1430–6.
15. Sears SF, Kirian KMA. Shock and patient-centered outcomes research: is an ICD shock still a critical event? *Pace-Pacing Clin Electrophysiol* 2010;**33**:5.
16. Pedersen SS, van den Berg M, Theuns DA. A viewpoint on the impact of device advisories on patient-centered outcomes. *Pacing Clin Electrophysiol* 2009;**32**:6.
17. Pedersen SS, van den Broek KC, Erdman RA, J VANS, Jordaens L, Theuns DA. Increased anxiety in partners of patients with a cardioverter–defibrillator: the role of indication for ICD therapy, shocks, and personality. *Pacing Clin Electrophysiol* 2009;**32**:184–92.
18. Undavia M, Goldstein NE, Cohen P, Sinthawarong K, Singson M, Bhutani D et al. Impact of implantable cardioverter–defibrillator recalls on patients' anxiety, depression, and quality of life. *Pacing Clin Electrophysiol* 2008;**31**:1411–8.
19. Birnie DH, Sears SF, Green MS, Lemery R, Gollob MH, Amyotte B. No long-term psychological morbidity living with an implantable cardioverter defibrillator under advisory: the Medtronic Marquis experience. *Europace* 2009;**11**:26–30.
20. Keren A, Sears SF, Nery P, Shaw J, Green MS, Lemery R et al. Psychological adjustment in ICD patients living with advisory Fidelis leads. *J Cardiovasc Electrophysiol* 2010;**22**:57–63.
21. Thomas SA, Friedmann E, Gottlieb SS, Liu F, Morton PG, Chapa DW et al. Changes in psychosocial distress in outpatients with heart failure with implantable cardioverter defibrillators. *Heart Lung* 2009;**38**:109–20.
22. Johansen JB, Pedersen SS, Spindler H, Andersen K, Nielsen JC, Mortensen PT. Symptomatic heart failure is the most important clinical correlate of impaired quality of life, anxiety, and depression in implantable cardioverter–defibrillator patients: a single-centre, cross-sectional study in 610 patients. *Europace* 2008;**10**:545–51.
23. Sears SF, Lewis TS, Kuhl EA, Conti JB. Predictors of quality of life in patients with implantable cardioverter defibrillators. *Psychosomatics* 2005;**46**:451–7.
24. Pedersen SS, den Broek KC, Theuns DA, Erdman RA, Alings M, Meijer A et al. Risk of chronic anxiety in implantable defibrillator patients: a multi-center study. *Int J Cardiol* 2009;**147**:4.
25. Pedersen SS, van Domburg RT, Theuns DA, Jordaens L, Erdman RA. Type D personality is associated with increased anxiety and depressive symptoms in patients with an implantable cardioverter defibrillator and their partners. *Psychosom Med* 2004;**66**:714–9.
26. Vazquez LD, Conti JB, Sears SF. Female-specific education, management, and lifestyle enhancement for implantable cardioverter defibrillator patients: the FEMALE-ICD study. *Pacing Clin Electrophysiol* 2010;**33**:1131–40.
27. Walker RL, Campbell KA, Sears SF, Glenn BA, Sotile R, Curtis AB et al. Women and the implantable cardioverter defibrillator: a lifespan perspective on key psychosocial issues. *Clin Cardiol* 2004;**27**:543–6.
28. Fox M, Firebaugh G. Confidence in science: The gender gap. *Social Science Quarterly* 1992;**73**:101–14.
29. Fillingim RB, King CD, Ribeiro-Dasilva MC, Rahim-Williams B, Riley JL III. Sex, gender, and pain: a review of recent clinical and experimental findings. *J Pain* 2009;**10**:447–85.
30. Spindler H, Johansen JB, Andersen K, Mortensen P, Pedersen SS. Gender differences in anxiety and concerns about the cardioverter defibrillator. *Pacing Clin Electrophysiol* 2009;**32**:614–21.
31. Crossmann A, Schulz SM, Kuhlkamp V, Ritter O, Neuser H, Schumacher B et al. A randomized controlled trial of secondary prevention of anxiety and distress in a German sample of patients with an implantable cardioverter defibrillator. *Psychosom Med* 2010;**72**:434–41.
32. Pedersen SS, Theuns DA, Erdman RA, Jordaens L. Clustering of device-related concerns and type D personality predicts increased distress in ICD patients independent of shocks. *Pacing Clin Electrophysiol* 2008;**31**:20–7.
33. van den Broek KC, Nyklicek I, Denollet J. Anxiety predicts poor perceived health in patients with an implantable defibrillator. *Psychosomatics* 2009;**50**:483–92.
34. Dunbar SB, Langberg JJ, Reilly CM, Viswanathan B, McCarty F, Culler SD et al. Effect of a psychoeducational intervention on depression, anxiety, and health resource use in implantable cardioverter defibrillator patients. *Pacing Clin Electrophysiol* 2009;**32**:1259–71.
35. Noyes K, Corona E, Veazie P, Dick AW, Zhao H, Moss AJ. Examination of the effect of implantable cardioverter–defibrillators on health-related quality of life: based on results from the Multicenter Automatic Defibrillator Trial-II. *Am J Cardiovasc Drugs* 2009;**9**:393–400.
36. Dickerson SS, Wu YW, Kennedy MC. A CNS-facilitated ICD support group: a clinical project evaluation. *Clin Nurse Spec* 2006;**20**:146–53.
37. Passman R, Subacius H, Ruo B, Schaechter A, Howard A, Sears SF et al. Implantable cardioverter defibrillators and quality of life: results from the defibrillators in nonischemic cardiomyopathy treatment evaluation study. *Arch Intern Med* 2007;**167**:2226–32.
38. Brouwers C, van den Broek KC, Denollet J, Pedersen SS. Gender disparities in psychological distress and quality of life among patients with an implantable cardioverter defibrillator. *Pacing Clin Electrophysiol* 2011;**34**:798–803.
39. Cohen J. *Statistical power analysis for the behavioral sciences*. 2nd ed. Hillsdale, NJ, USA: L. Erlbaum Associates; 1988.
40. Van der Ploeg HM, Defares PB, Spielberger CD. *Handleiding bij de Zelf-Beoordelings Vragenlijst (ZBV). Een nederlandse bewerking van de Spielberger State-Trait Anxiety Inventory. Manual for the ZBV. A Dutchlanguage adaptation of the Spielberger State-Trait Anxiety Inventory*. Lisse, The Netherlands: Swets & Zeitlinger B.V.; 1980.
41. Aaronson NK, Muller M, Cohen PD, Essink-Bot ML, Fekkes M, Sanderman R et al. Translation, validation, and norming of the Dutch language version of the SF-36 Health Survey in community and chronic disease populations. *J Clin Epidemiol* 1998;**51**:1055–68.
42. Ware JE Jr. *SF-36 Health Survey; manual and interpretation guide*. Boston: Health Institute, New England Medical Centre; 1993.
43. Denollet J. DS14: standard assessment of negative affectivity, social inhibition, and Type D personality. *Psychosom Med* 2005;**67**:89–97.
44. Emons WH, Meijer RR, Denollet J. Negative affectivity and social inhibition in cardiovascular disease: evaluating Type D personality and its assessment using item response theory. *J Psychosom Res* 2007;**63**:27–39.
45. Martens EJ, Kupper N, Pedersen SS, Aquarius AE, Denollet J. Type D personality is a stable taxonomy in post-MI patients over an 18-month period. *J Psychosom Res* 2007;**63**:545–50.
46. Versteeg H, Baumert J, Kolb C, Pedersen SS, Denollet J, Ronel J et al. Somatosensory amplification mediates sex differences in psychological distress among cardioverter-defibrillator patients. *Health Psychol* 2010;**29**:477–83.
47. Rueda B, Perez-Garcia AM. Gender and social support in the context of cardiovascular disease. *Women Health* 2006;**43**:59–73.
48. Agewall S, Berglund M, Henareh L. Reduced quality of life after myocardial infarction in women compared with men. *Clin Cardiol* 2004;**27**:271–4.
49. van Doering LRN, McKinley S, Riegel B, Moser DK, Meischke H, Pelter MM et al. Gender-specific characteristics of individuals with depressive symptoms and coronary heart disease. *Heart Lung* 2010; In press:10.
50. Pedersen SS, Theuns DA, Muskens-Heemskerk A, Erdman RA, Jordaens L. Type-D personality but not implantable cardioverter–defibrillator indication is associated with impaired health-related quality of life 3 months post-implantation. *Europace* 2007;**9**:675–80.
